# Supplementary material
Source: PubMed Central journal article supplement (PMC4155599)
Supplement: NIHMS622251-supplement-Title_Page.pdf [file NIHMS622251-supplement-Title_Page.pdf]

A Biomechanical and Evolutionary Perspective on the Function of the Lumbrical Muscle

Keming Wang, MD<sup>1</sup>

Evan P. McGlinn, BS<sup>2</sup>

Kevin C. Chung, MD, MS<sup>3</sup>

1. Attending physician, 17<sup>th</sup> Department of Plastic Surgery, Plastic Surgery Hospital, Chinese Academy of Medical Sciences, Peking Union Medical College
2. Research Associate, Section of Plastic Surgery, University of Michigan Health System
3. Professor of Surgery, Section of Plastic Surgery, Assistant Dean for Faculty Affairs, The University of Michigan Medical School

Running Title: Function of the Lumbrical Muscles

Keywords: Intrinsic hand muscles, Lumbrical muscle, Muscle spindles

Research reported in this publication was supported by the National Institute of Arthritis and Musculoskeletal and Skin Diseases of the National Institutes of Health under Award Number K24 AR053120. The content is solely the responsibility of the authors and does not necessarily represent the official views of the National Institutes of Health.

Corresponding Author:  
Kevin C. Chung, MD, MS  
Section of Plastic Surgery  
University of Michigan Health System  
2130 Taubman Center, SPC 5340  
1500 E. Medical Center Drive  
Ann Arbor, MI, 48109-5340  
kechung@med.umich.edu  
Phone 734-936-5885  
Fax 734-763-5354
